# Supplementary material for: Geographic diversity of human liver cancers mirrors global social inequalities
Source: Front Oncol. 2025 May 16;15:1565692. doi: 10.3389/fonc.2025.1565692 (PMC12122337; doi:10.3389/fonc.2025.1565692)
Supplement: Supplementary Table 1 — Estimated age-standardized incidence, mortality rates and Mortality-to-Incidence ratios (MIRs) of liver and intrahepatic bile duct cancers worldwide per 105 individuals, for both sexes in 2022. Data source: GLOBOCAN 2022, Cancer Today, International Agency for Research on Cancer, World Health Organization (https://gco.iarc.fr/en). Alpha-3 population codes (ISO/UN) and MIR equation are provided. [file Table1.xlsx]

## Sheet: Dataset
Population code (ISO/UN)	Population	Alpha‑3 code	ASR of Incidence (World) per 100 000	ASR of Mortality (World) per 100 000	% MIR (World)
4	Afghanistan	AFG	4.6	4.48	97.3913
8	Albania	ALB	3.24	3.1	95.679
12	Algeria	DZA	1.65	1.45	87.8788
24	Angola	AGO	6.56	6.41	97.7134
32	Argentina	ARG	3.74	3.13	83.6898
51	Armenia	ARM	10.65	9.44	88.6385
36	Australia	AUS	7.18	4.76	66.2953
40	Austria	AUT	4.85	3.9	80.4124
31	Azerbaijan	AZE	5.44	4.83	88.7868
44	Bahamas	BHS	4.12	3.52	85.4369
48	Bahrain	BHR	2.7	2.42	89.6296
50	Bangladesh	BGD	2.1	2	95.2381
52	Barbados	BRB	2.38	2.38	100
112	Belarus	BLR	3.44	3.02	87.7907
56	Belgium	BEL	4.79	3.74	78.0793
84	Belize	BLZ	7.01	6.67	95.1498
204	Benin	BEN	8.17	7.84	95.9608
64	Bhutan	BTN	4.52	4.52	100
68	Bolivia	BOL	6.74	5.96	88.4273
70	Bosnia Herzegovina	BIH	6.59	5.91	89.6813
72	Botswana	BWA	1.56	1.45	92.9487
76	Brazil	BRA	4.49	4.28	95.3229
96	Brunei Darussalam	BRN	8.74	7.44	85.1259
100	Bulgaria	BGR	4.41	4.2	95.2381
854	Burkina Faso	BFA	17.07	16.63	97.4224
108	Burundi	BDI	5.81	5.6	96.3855
116	Cambodia	KHM	25.07	23.67	94.4156
120	Cameroon	CMR	5.8	5.62	96.8966
124	Canada	CAN	5.87	4.26	72.5724
132	Cape Verde	CPV	1.1	1.46	132.727
140	Central African Republic	CAF	6.38	6.28	98.4326
148	Chad	TCD	19.05	18.46	96.9029
152	Chile	CHL	4.69	4.49	95.7356
156	China	CHN	15.03	12.59	83.7658
170	Colombia	COL	3.64	3.33	91.4835
174	Comoros	COM	5	5	100
180	Congo, Democratic Republic of	COD	6.12	5.9	96.4052
178	Congo, Republic of	COG	6.93	6.84	98.7013
188	Costa Rica	CRI	5.04	5.11	101.389
384	Côte d'Ivoire	CIV	7.95	7.56	95.0943
191	Croatia	HRV	5.24	4.54	86.6412
192	Cuba	CUB	4.1	3.53	86.0976
196	Cyprus	CYP	5.64	5.29	93.7943
203	Czechia	CZE	3.88	3.4	87.6289
208	Denmark	DNK	4.62	3.81	82.4675
262	Djibouti	DJI	3.48	3.48	100
214	Dominican Republic	DOM	6.78	5.94	87.6106
218	Ecuador	ECU	5.16	4.68	90.6977
818	Egypt	EGY	31.99	30.81	96.3113
222	El Salvador	SLV	5.62	5.23	93.0605
226	Equatorial Guinea	GNQ	7.44	7.39	99.328
232	Eritrea	ERI	4.29	4.13	96.2704
233	Estonia	EST	4.53	4.41	97.351
748	Eswatini	SWZ	3.95	3.95	100
231	Ethiopia	ETH	4.1	3.99	97.3171
242	Fiji	FJI	9.74	8.74	89.7331
246	Finland	FIN	4.13	3.75	90.799
250	France (metropolitan)	FRA	7.76	5.92	76.2887
312	France, Guadeloupe	GLP	4.25	3.93	92.4706
638	France, La Réunion	REU	6.55	5.64	86.1069
474	France, Martinique	MTQ	3.56	2.87	80.618
254	French Guyana	GUF	3.76	3.76	100
258	French Polynesia	PYF	8.47	8.19	96.6942
266	Gabon	GAB	8.89	8.62	96.9629
275	Gaza Strip and West Bank	PSE	5.07	4.84	95.4635
268	Georgia	GEO	6.72	5.72	85.119
276	Germany	DEU	4.49	3.5	77.951
288	Ghana	GHA	16.06	14.95	93.0884
300	Greece	GRC	5.38	4.26	79.1822
316	Guam	GUM	15.09	11.94	79.1252
320	Guatemala	GTM	15.54	14.86	95.6242
324	Guinea	GIN	21.29	20.83	97.8394
624	Guinea-Bissau	GNB	13.27	13.22	99.6232
328	Guyana	GUY	3.48	3.25	93.3908
332	Haiti	HTI	9.28	7.82	84.2672
340	Honduras	HND	5.36	4.76	88.806
348	Hungary	HUN	4.31	3.87	89.7912
352	Iceland	ISL	3.75	3.48	92.8
356	India	IND	2.74	2.61	95.2555
360	Indonesia	IDN	8.03	7.88	98.132
364	Iran, Islamic Republic of	IRN	6.43	6.29	97.8227
368	Iraq	IRQ	3.41	3.35	98.2405
372	Ireland	IRL	5.71	4.72	82.662
376	Israel	ISR	2.82	2.29	81.2057
380	Italy	ITA	6.78	4.88	71.9764
388	Jamaica	JAM	2.92	2.43	83.2192
392	Japan	JPN	9.15	4.3	46.9945
400	Jordan	JOR	2.63	2.61	99.2395
398	Kazakhstan	KAZ	5.3	4.21	79.434
404	Kenya	KEN	2.88	2.76	95.8333
408	Korea, Democratic People Republic of	PRK	16.36	15.3	93.5208
410	Korea, Republic of	KOR	13.68	10.67	77.9971
414	Kuwait	KWT	4.26	4.05	95.0704
417	Kyrgyzstan	KGZ	7.82	7.3	93.3504
418	Lao People's Democratic Republic	LAO	24.94	23.65	94.8276
428	Latvia	LVA	4.28	3.93	91.8224
422	Lebanon	LBN	2.34	2.3	98.2906
426	Lesotho	LSO	3.03	3	99.0099
430	Liberia	LBR	14.8	14.53	98.1757
434	Libya	LBY	4.72	4.46	94.4915
440	Lithuania	LTU	4.86	4.5	92.5926
442	Luxembourg	LUX	4.5	3.35	74.4444
450	Madagascar	MDG	5.51	5.21	94.5554
454	Malawi	MWI	3.93	3.82	97.201
458	Malaysia	MYS	6.49	6.27	96.6102
462	Maldives	MDV	7.6	7.53	99.0789
466	Mali	MLI	8.59	8.34	97.0896
470	Malta	MLT	4.25	3.34	78.5882
478	Mauritania	MRT	9.31	9.05	97.2073
480	Mauritius	MUS	3.56	2.56	71.9101
484	Mexico	MEX	5.71	5.01	87.7408
498	Moldova	MDA	10.07	9.1	90.3674
496	Mongolia	MNG	96.12	80.16	83.3958
499	Montenegro	MNE	4.72	4.51	95.5508
504	Morocco	MAR	2.57	2.4	93.3852
508	Mozambique	MOZ	8	7.5	93.75
104	Myanmar	MMR	10.68	10.36	97.0037
516	Namibia	NAM	3.79	3.7	97.6253
524	Nepal	NPL	2.13	2.07	97.1831
540	New Caledonia	NCL	9.03	8	88.5936
554	New Zealand	NZL	4.03	3.3	81.8859
558	Nicaragua	NIC	9.78	9.35	95.6033
562	Niger	NER	9.8	9.5	96.9388
566	Nigeria	NGA	4.2	4.14	98.5714
807	North Macedonia	MKD	5.41	5.06	93.5305
578	Norway	NOR	4.08	3.24	79.4118
512	Oman	OMN	4.6	4.43	96.3043
586	Pakistan	PAK	3.8	3.65	96.0526
591	Panama	PAN	4.26	3.54	83.0986
598	Papua New Guinea	PNG	11.99	11.66	97.2477
600	Paraguay	PRY	2.96	2.57	86.8243
604	Peru	PER	4.88	4.17	85.4508
608	Philippines	PHL	12.43	11.59	93.2422
616	Poland	POL	3.26	2.78	85.2761
620	Portugal	PRT	6.73	5.76	85.5869
630	Puerto Rico	PRI	6.25	5.22	83.52
634	Qatar	QAT	4.1	3.87	94.3902
642	Romania	ROU	8.88	8.15	91.7793
643	Russian Federation	RUS	4.25	4.02	94.5882
646	Rwanda	RWA	4.86	4.59	94.4444
662	Saint Lucia	LCA	1.21	1.05	86.7769
882	Samoa	WSM	5.48	5.48	100
678	Sao Tome and Principe	STP	8.02	8.02	100
682	Saudi Arabia	SAU	4.72	4.61	97.6695
686	Senegal	SEN	11.1	10.91	98.2883
688	Serbia	SRB	4.45	4.05	91.0112
694	Sierra Leone	SLE	5.91	5.73	96.9543
702	Singapore	SGP	12.07	11	91.135
703	Slovakia	SVK	4.43	4.03	90.9707
705	Slovenia	SVN	6.43	5.94	92.3795
90	Solomon Islands	SLB	10.93	10.93	100
706	Somalia	SOM	3.69	3.64	98.645
710	South Africa	ZAF	4.87	4.49	92.1971
728	South Sudan	SSD	5.17	5.06	97.8723
724	Spain	ESP	6.03	4.47	74.1294
144	Sri Lanka	LKA	1.19	1.12	94.1176
729	Sudan	SDN	4.37	4.28	97.9405
740	Suriname	SUR	6.9	6.1	88.4058
752	Sweden	SWE	4.6	3.26	70.8696
756	Switzerland	CHE	5.36	3.7	69.0299
760	Syrian Arab Republic	SYR	2.75	2.66	96.7273
762	Tajikistan	TJK	4.57	4.39	96.0613
834	Tanzania, United Republic of	TZA	3.37	3.3	97.9228
764	Thailand	THA	22.65	21.99	97.0861
528	The Netherlands	NLD	3.44	3.17	92.1512
270	The Republic of the Gambia	GMB	17.89	17.51	97.8759
626	Timor-Leste	TLS	5.42	4.93	90.9594
768	Togo	TGO	4.31	4.24	98.3759
780	Trinidad and Tobago	TTO	2.83	2.57	90.8127
788	Tunisia	TUN	4.05	3.65	90.1235
792	Türkiye	TUR	4.66	4.35	93.3476
795	Turkmenistan	TKM	6.16	5.66	91.8831
800	Uganda	UGA	8.86	8.51	96.0497
804	Ukraine	UKR	2.58	2.49	96.5116
784	United Arab Emirates	ARE	2.7	2.57	95.1852
826	United Kingdom	GBR	4.79	4.04	84.3424
840	United States of America	USA	6.75	4.42	65.4815
858	Uruguay	URY	3	2.46	82
860	Uzbekistan	UZB	5.35	4.83	90.2804
548	Vanuatu	VUT	12.12	11.57	95.462
862	Venezuela	VEN	4.01	3.59	89.5262
704	Viet Nam	VNM	20.2	19.25	95.297
887	Yemen	YEM	4.44	4.23	95.2703
894	Zambia	ZMB	4.65	4.44	95.4839
716	Zimbabwe	ZWE	7.71	7.38	95.7198
